# Supplementary material for: Orphan nuclear receptor Nurr1 promotes Helicobacter pylori-associated gastric carcinogenesis by directly enhancing CDK4 expression
Source: PubMed Central journal article supplement — eBioMedicine. 2020 Feb 27;53:102672. doi: 10.1016/j.ebiom.2020.102672 (PMC7047206; doi:10.1016/j.ebiom.2020.102672), 2020-02-27
Supplement: mmc1.pdf [file mmc1.pdf]

**Table 1: siRNA used in study**

---

|          |                               |
|----------|-------------------------------|
| Nurr1 si | 5' - GCUAUGACCAGCCUGGACU - 3' |
| Sp1 si   | 5' - CAUACCAGGUGCAAACCAA - 3' |

---

**Table 2: RT-PCR primers used in this study**

---

|             |                                                                                      |
|-------------|--------------------------------------------------------------------------------------|
| Nurr1       | Forward: 5' - TCCAACGAGGGGCTGTGCG - 3'<br>Reverse: 5' - CACTGTGCGCTTAAAGAAGC - 3'    |
| CDK4        | Forward: 5' - TTTGTGGCCCTCAAGAGTGT - 3'<br>Reverse: 5' - TCCTTGATCGTTTCGGCTGG - 3'   |
| Sp1         | Forward: 5' - GGCGAGAGGCCATTTATGTGT-3'<br>Reverse: 5' - TGCATGACGTTGATGCCACT - 3'    |
| E2F1        | Forward: 5' - GATCGGGCCTTGTTTGCTCTT - 3'<br>Reverse: 5' - GATCGGGCCTTGTTTGCTCTT - 3' |
| CCND2       | Forward: 5' - TACCTCGACCGTTTCTTGGC - 3'<br>Reverse: 5' - AGGCTTGATGGAGTTGTCCG - 3'   |
| P15         | Forward: 5' - TCGCGAGGAGAACAAGG - 3'<br>Reverse: 5' - CCATCATCATGACCTGGATCG - 3'     |
| VEGF        | Forward: 5' - TTTGGAGTCGCCACAAACA - 3'<br>Reverse: 5' - TGTTACGGTTTGGGGCCTT - 3'     |
| Actin       | Forward: 5' - AGTTGCGTTACACCCTTCTTG - 3'<br>Reverse: 5' - CACCTTCACCGTTCCAGTTTT - 3' |
| $\beta$ 2-M | Forward: 5' - GAATTGCTATGTGTCTGGGT - 3'<br>Reverse: 5' - CATCTTCAAACCTCCATGATG - 3'  |

---

**Table 3: Primers used in CHIP**

---

|          |                                          |
|----------|------------------------------------------|
| CDK4 P   | Forward: 5' - TGTGCAATCCTGTATCCGTCT - 3' |
|          | Reverse: 5' - GGCCATCTGGCAGAGAAGTT - 3'  |
| Nurr1 P1 | Forward: 5' - GGGCTGCAGATTAGGGTTGA - 3'  |
|          | Reverse: 5' - CCGCTTTTCTACTCGCGCA - 3'   |
| Nurr1 P2 | Forward: 5' - CTGCGCGAGTAGAAAAGCG - 3'   |
|          | Reverse: 5' - TTCTAGCAAAGGAAACGCCG - 3'  |
| Nurr1 P3 | Forward: 5' - ATATACCAAAGCGAGCGCGG - 3'  |
|          | Reverse: 5' - GCCAACATGCACCTAAAGTCT - 3' |

---

**Table 4: Antibodies used in study**

| Antibody       | Company       | Identifier |
|----------------|---------------|------------|
| Nurr1          | Abcam         | ab41917    |
| CDK4           | CST           | 12790      |
| Ki67           | Abcam         | ab15580    |
| $\beta$ -actin | Sigma-Aldrich | A1978      |
| Sp1            | Abcam         | ab13370    |
| AKT            | CST           | 4691       |
| P-AKT          | CST           | 4060       |
| CagA           | Santa         | sc-28368   |

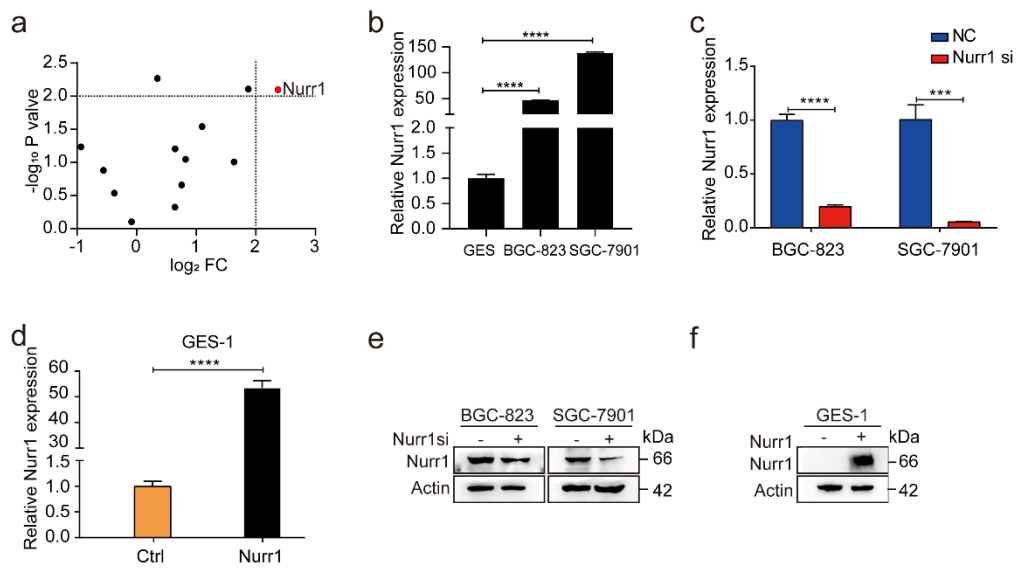

**Figure S1. Nurr1 expression in GC cells.** (a) Volcano map analyzed the expression and P value of 13 nuclear receptors in GC specimens with respect to the AG specimens (Nurr1  $P=0.008$ ). (b) Nurr1 mRNA expression in two GC lines (BGC-823, SGC-7901) and immortalized gastric cells GES-1. (c-d) Nurr1 mRNA expression in BGC-823 and SGC-7901 cells transfected with Nurr1 siRNA (c) and in GES-1 cells transfected with Nurr1-coding plasmid (d).  $***P<0.001$ ,  $****P<0.0001$ , by Student's t-test. (e-f) Western blot analysis of Nurr1 protein expression in BGC-823 and SGC-7901 cells transfected with Nurr1 siRNA (e) and in GES-1 cells transfected with Nurr1-coding plasmid (f).

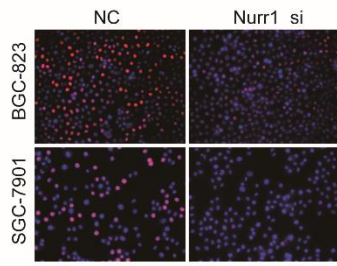

**Figure S2. Nurr1 promotes GC cells proliferation.** EdU assay after cells transfected with Nurr1 siRNA in BGC-823 and SGC-7901 cells. Blue: DAPI, red: EdU-positive.

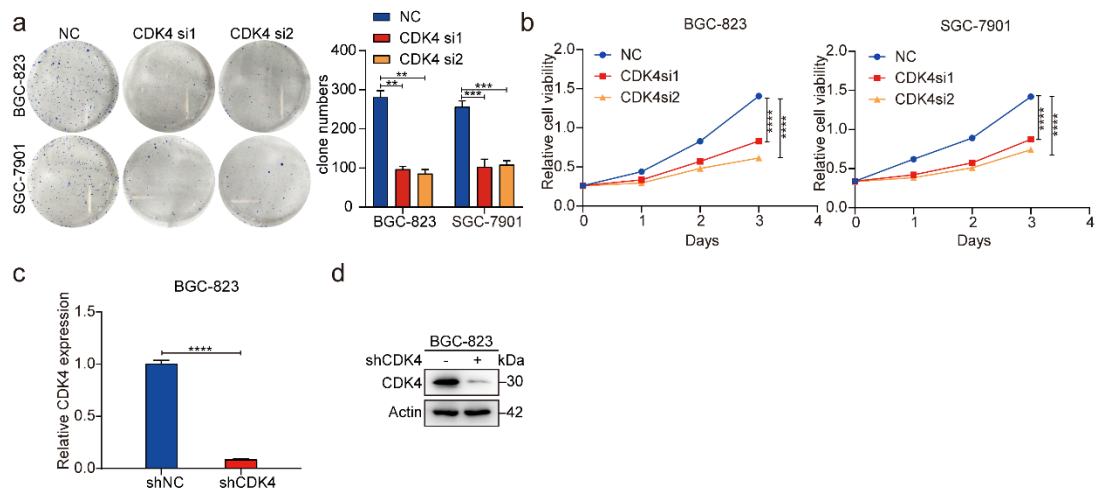

**Figure S3. CDK4 facilitates GC cells proliferation *in vitro*.** a-b Colony formation (a) and CCK8 assay (b) after cells transfected with CDK4 siRNAs. (c-d) CDK4 mRNA and protein expression in BGC-823 cells transfected with lenti-CDK4 shRNA. \*\* $P < 0.01$ , \*\*\* $P < 0.001$ , \*\*\*\* $P < 0.0001$ , by Student's t-test.

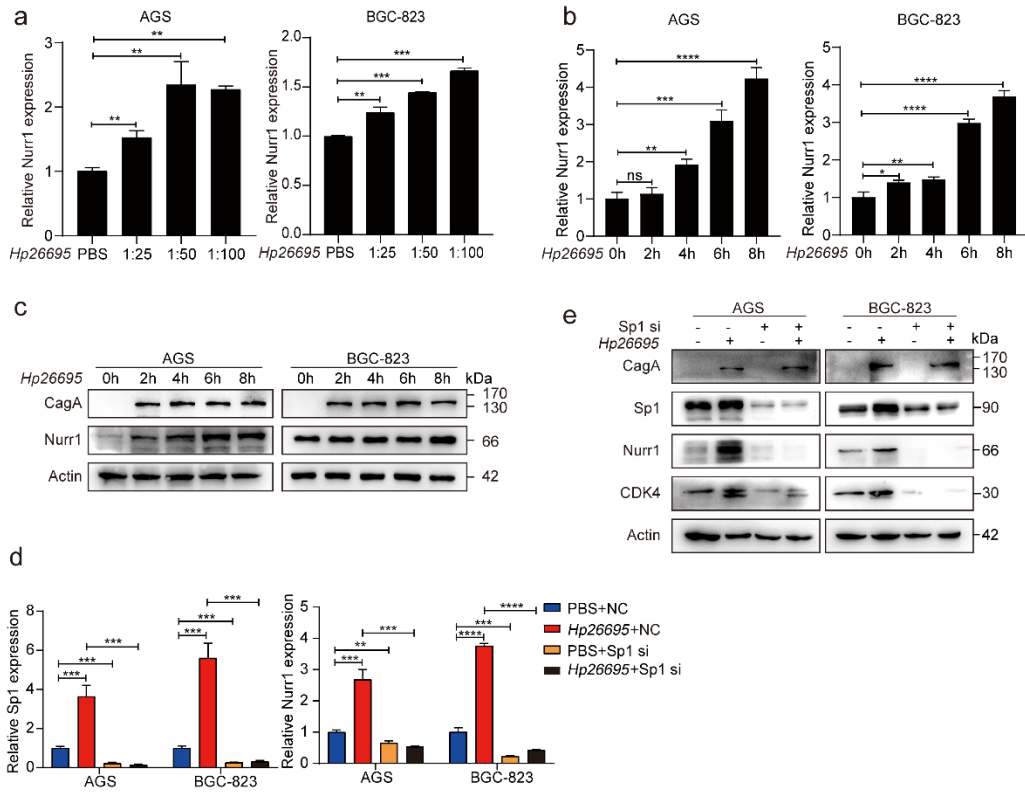

**Figure S4. Infection of *H. pylori* facilitates Nurr1 expression.** (a-b) mRNA expression of Nurr1 in AGS and BGC-823 cells infected with *H. pylori* (*Hp26695*) at different MOI (a) and different time points (b). \* $P < 0.05$ , \*\* $P < 0.01$ , \*\*\* $P < 0.001$ , \*\*\*\* $P < 0.0001$ , by Student's t-test. (c) Western blot analysis of Nurr1 expression in AGS and BGC-823 cells infected with *H. pylori* (*Hp26695*) at different time points. (d-e) Sp1 and Nurr1 mRNA (d) and protein (e) expression in AGS and BGC-823 cells transfected with Sp1 siRNA and *H. pylori* (*Hp26695*) treatment. \*\* $P < 0.01$ , \*\*\* $P < 0.001$ , \*\*\*\* $P < 0.0001$ , by Student's t-test.



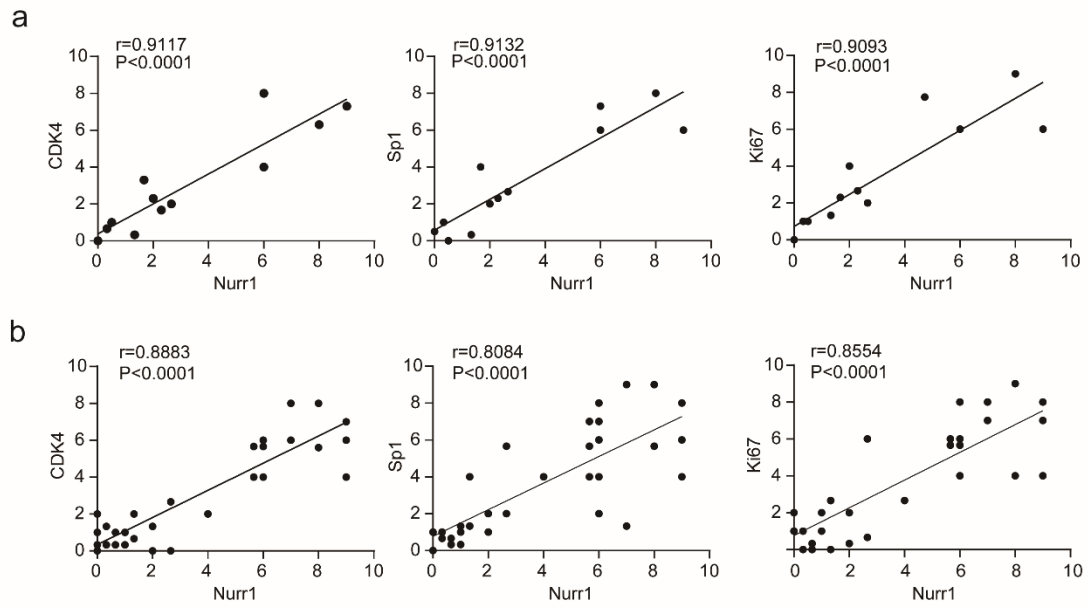

**Figure S5. Correlation analysis.** The correlation of CDK4, Sp1, Ki67 with Nurr1 in mucosal epithelial tissues of control, MNU and MNU-Hp treated mice (a). The correlation of CDK4, Sp1, Ki67 with Nurr1 in GC samples and corresponding normal samples (b).

a

BGC-823

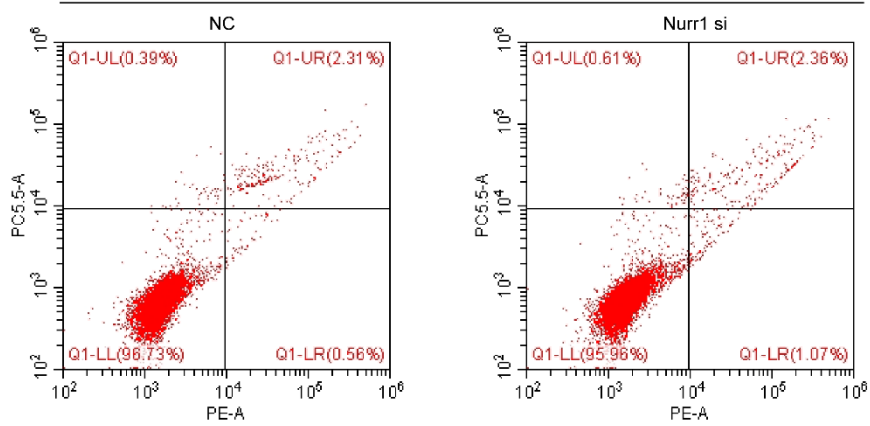

b

SGC-7901

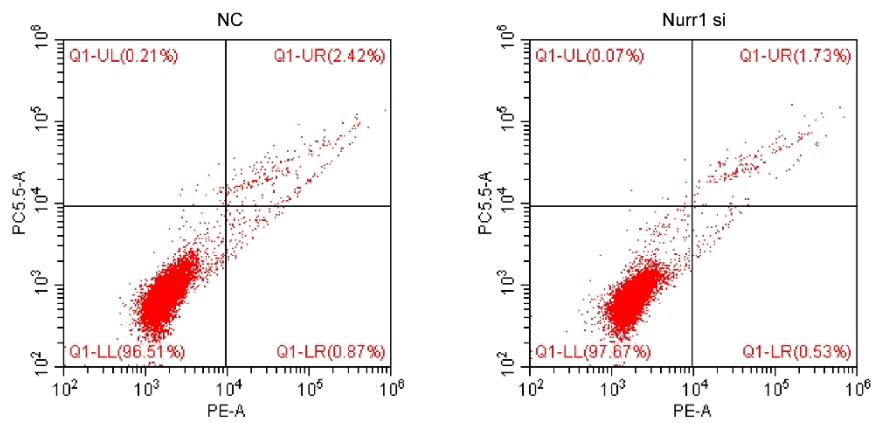

**Figure S6. Nurr1 has no effect on GC cells apoptosis.** Cells apoptosis in BGC-823 (a) and SGC-7901 cells (b) transfected with Nurr1 siRNAs.
